1 **HIGH VIRULENCE SELECTS FOR FAST HOST RESISTANCE**  
2 **EVOLUTION**

3  
4  
5 CAROLIN C. WENDLING<sup>1,2\*</sup>  
6 JANINA LANGE<sup>1</sup>  
7 HEIKO LIESEGANG<sup>3</sup>  
8 ANJA PÖHLEIN<sup>3</sup>  
9 BOYKE BUNG<sup>4</sup>  
10 JELENA RAIKOV<sup>1</sup>  
11 HENRY GÖHLICH<sup>1</sup>  
12 OLIVIA ROTH<sup>1</sup>  
13 MICHAEL A. BROCKHURST<sup>5</sup>

14  
15 **Addresses:**

16  
17 <sup>1</sup>GEOMAR Helmholtz Centre for Ocean Research Kiel, Marine Evolutionary Ecology,  
18 Düsternbrooker Weg 20, 24105 Kiel, Germany

19  
20 <sup>2</sup>ETH Zürich, Institute of Integrative Biology, Universitätstrasse 16, CHN D 33, 8092  
21 Zürich, Switzerland

22  
23 <sup>3</sup>Georg-August-University Göttingen, department of genomic and applied microbiology,  
24 Grisebachstr 8 37077 Göttingen, Germany.

25  
26 <sup>4</sup>Leibniz Institute DSMZ-German Collection of Microorganisms and Cell Cultures,  
27 Department Bioinformatics and Databases, Inhoffenstr. 7B, 38114 Braunschweig,  
28 Germany

29  
30 <sup>5</sup>Division of Evolution and Genomic Sciences, University of Manchester, Dover Street,  
31 Manchester M13 9PT, UK

32  
33 \*Corresponding author:

34 E-mail: [carolin.wendling@env.ethz.ch](mailto:carolin.wendling@env.ethz.ch); Phone: +41 44 633 80 26

35 **ABSTRACT**

36 Infectious organisms can vary tremendously in their virulence. While the evolution  
37 of virulence and different levels thereof has received much attention over the past  
38 decades, the evolution of host resistance in response to different levels of virulence is  
39 far less understood. We expect benefits of host resistance relative to the costs of disease  
40 symptoms to be higher against highly virulent compared to low virulent infections and  
41 hypothesised that high virulence will select for faster resistance evolution, and  
42 ultimately shorter epidemics if parasites fail to overcome these evolved host resistances.  
43 To test this hypothesis, we performed a bacteria-phage co-evolution experiment using  
44 two filamentous phages that differ in their virulence. We found that resistance to  
45 filamentous phages can emerge via two ways: (1) superinfection exclusion, whereby the  
46 phage becomes part of the bacterial genome and protects its host against subsequent  
47 phage infections, and (2) surface-receptor modifications which prevent phages from  
48 entering the host cell. While superinfection exclusion emerged at a similar rate against  
49 both phages we observed that resistance evolution through surface-receptor  
50 modifications emerged significantly faster against the high virulent phage. This resulted  
51 in faster phage extinction and suggests that we can expect shorter epidemics in highly  
52 virulent infections, when viruses are unable to overcome host resistance evolution.

53

54

55 **Keywords:** filamentous phages, experimental evolution, virus, virulence

## 56 INTRODUCTION

57 Infectious agents vary strikingly in virulence and the resulting selection they  
58 impose on their host. While some human viruses such as Ebola or rabies can cause a  
59 deadly disease, others (including many cold viruses) often remain asymptomatic. Even  
60 closely related viruses, such as different strains of myxoma (Fenner and Marshall 1957),  
61 or corona viruses (Weiss and Leibowitz 2011) can differ tremendously in virulence. The  
62 evolution of different levels of virulence has been suggested to result from a trade-off  
63 between parasite reproduction and transmission (Anderson and May 1982, May and  
64 Anderson 1983). Higher reproduction results in higher virulence but also in higher host  
65 morbidity and mortality and thus limited chances for transmission. Accordingly,  
66 virulence increases with natural selection, but only until the threshold where the costs of  
67 transmission, caused by the harm to the host, are outweighed by the transmission  
68 benefits.

69 The evolution of virulence has been studied extensively during the last two  
70 decades, both using selection experiments (Bull, Molineux et al. 1991, Turner, Cooper  
71 et al. 1998, Messenger, Molineux et al. 1999) and parasites evolved in nature (Herre  
72 1993, Ebert 1994). What remains open, however, is the question of how virulence will  
73 impact evolutionary trajectories of resistance in a host population, and how these  
74 trajectories change with different levels of virulence. Severe disease symptoms resulting  
75 from highly virulent infections will significantly reduce host fitness imposing a strong  
76 need for hosts to quickly acquire resistance, for instance through evolutionary changes.  
77 Thus, we expect benefits of host resistance relative to the costs of disease symptoms to  
78 be higher against highly virulent compared to low virulent infections. If this holds true,  
79 high virulence will lead to a stronger and thus faster selection for host resistance, and  
80 ultimately shorter epidemics if parasites fail to overcome these evolved host resistances.

81 To explore how variation in virulence between closely related viruses influences  
82 the dynamics of host resistance evolution, we designed a co-evolution experiment using  
83 the model strain *Vibrio alginolyticus* K01M1 as a host and two closely related versions  
84 of the filamentous *Vibrio* phage VALGΦ8, that differ in their replication rate and hence  
85 in their virulence (Table 1)(Chibani, Hertel et al. 2020). Filamentous phages (family  
86 *Inoviridae*), i.e., long, thin proteinaceous filaments which contain a circular single-  
87 stranded DNA genome have been shown to be ideal model systems to study virulence  
88 evolution (Bull, Molineux et al. 1991, Messenger, Molineux et al. 1999). These phages  
89 can establish chronic infections whereby virions are continuously released without lysis.  
90 Even though filamentous phages do not kill their host, they can inflict harm on them as  
91 infections typically lead to reduced growth rates. This is because the host cell pays the  
92 metabolic costs resulting from phage replication and through phage-encoded proteins  
93 inserted into the bacterial membrane (Mai-Prochnow, Hui et al. 2015). Thus, the  
94 virulence of filamentous phages, which can vary tremendously across phage types  
95 (Rakonjac 2012), can be directly quantified by measuring the reduction in bacterial  
96 growth rate.

97 By combining experimental evolution and whole genome sequencing, we show that  
98 resistance by super-infection exclusion (i.e., infected bacteria became resistant to further  
99 infection) is a fast way to acquire phage resistance and occurs at a similar rate in both  
100 treatments. In contrast, selection for resistance evolution, i.e., surface receptor  
101 modifications, is significantly stronger against high virulent compared to low virulent  
102 phages. This resulted in faster phage extinction and ultimately shorter epidemics in  
103 bacterial lineages that rapidly evolved resistance against high virulent infections.

104

105 **MATERIAL AND METHODS**

106 (a) Strains and culture conditions

107 Experiments were conducted using the *Vibrio alginolyticus* strain K01M1 (Chibani,  
108 Roth et al. 2020). K01M1 contains one integrated filamentous *Vibrio* phage VALGΦ6  
109 (later called: resident K01M1Φ-phage throughout the manuscript), which replicates at a  
110 very low frequency (Chibani, Hertel et al. 2020). Compared to other, closely related *V.*  
111 *alginolyticus* strains, K01M1 is highly susceptible to infections by filamentous phages  
112 (Wendling, Piecyk et al. 2017). For the selection experiment we used two different  
113 versions of the filamentous *Vibrio* phage VALGΦ8 (Table 1), one integrative (isolated  
114 from the host strain K04M5) and one episomal (isolated from the host strain K04M1).  
115 While both phages have been shown to significantly reduce the growth of K01M1  
116 (Wendling, Piecyk et al. 2017, Wendling, Goehlich et al. 2018), infections with the high  
117 virulent phage impose a significantly stronger reduction in bacterial growth than  
118 infections with the low virulent phage. All experiments were carried out in liquid  
119 medium (Medium101: 0.5% (w/v) peptone, 0.3% (w/v) meat extract, 3.0% (w/v) NaCl  
120 in MilliQ water) at 25° C in 30-ml microcosms containing 6 ml of medium with  
121 constant shaking at 180 rpm.

122

123 **Table 1** Bacteria and phages (including NCBI accession numbers) used in the present study.

| Isolate                       | Accession Number(s)      | Phages                                                                        | Role in evolution experiment                  |
|-------------------------------|--------------------------|-------------------------------------------------------------------------------|-----------------------------------------------|
| <i>V. alginolyticus</i> K01M1 | CP017889.1<br>CP017890.1 | <i>Vibrio</i> phage VALGΦ6                                                    | Host strain during evolution experiment       |
| <i>V. alginolyticus</i> K04M1 | CP017891.1<br>CP017892.1 | <i>Vibrio</i> phage VALGΦ6<br><i>Vibrio</i> phage VALGΦ8 (episomal)           | Donor of the episomal, low virulent phage     |
| <i>V. alginolyticus</i> K04M5 | CP017899.1<br>CP017900.1 | <i>Vibrio</i> phage VALGΦ6<br><i>Vibrio</i> phage VALGΦ8 (integrative on CR2) | Donor of the integrative, high virulent phage |
| <i>Vibrio</i> phage VALGΦ6    | MN690600                 |                                                                               | Resident phage in ancestral K01M1             |
| <i>Vibrio</i> phage VALGΦ8    | MN719123                 |                                                                               | Co-evolving phage in evolution experiment     |

124

125 (b) Selection experiment

126 Six replicate populations were founded for each of three treatments from  
127 independent clones of K01M1. Treatments comprised (a) a high virulent, integrative  
128 version of the filamentous *Vibrio* phage VALGΦ8, later called VALGΦ8<sub>K04M1</sub>, (b) a  
129 low virulent, episomal version of the filamentous *Vibrio* phage VALGΦ8, later called  
130 VALGΦ8<sub>K04M5</sub>, and (c) no phage as control. Each population was established from 60 µl  
131 of an independent overnight culture ( $5 \times 10^8$  CFU/ml). At the beginning of the  
132 experiment, we inoculated phage-containing treatments with 300 µl of a  $5 \times 10^{10}$  PFU/ml  
133 stock solution. Populations were propagated by transferring 1% to fresh medium every  
134 24 hours for a total of 30 transfers. On transfer T0, T1, T2 followed by every other  
135 transfer, phage and bacterial densities were determined, as described below and whole  
136 population samples were frozen at -80° C at a final concentration of 33% glycerol. In  
137 addition, on transfer T0, T1, T2, T6, followed by every sixth transfer 24 single colonies  
138 were isolated at random from each population and stored at -80° C. Two populations  
139 from the control treatment tested positive for virus infection, indicating contamination,  
140 were excluded from later assays.

141

142 (c) Bacterial and phage densities

143 *Bacterial densities:* bacterial densities were determined by plating out 100 µl of a  
144 dilution series ranging from  $10^{-5}$  to  $10^{-7}$  on *Vibrio* selective Thiosulfate Citrate Bile  
145 Sucrose Agar (TCBS) plates (Fluka Analytica). Plates were incubated over night at 25°  
146 C and the total amount of colonies was counted the following day.

147 *Phage densities:* Quantification of filamentous phages by standard spot assays is  
148 often not possible (Rakonjac 2011). Instead of typical lytic plaques we mostly observed  
149 opaque zonas of reduced growth. Thus, we used spectrometry to quantify phage

150 prevalence (<http://www.abdesignlabs.com/technical-resources/bacteriophage->  
151 [spectrophotometry](#)), which uses the constant relationship between the length of viral  
152 DNA and the amount of the major coat protein VIII of filamentous phages, which,  
153 together, are the main contributors of the absorption spectrum in the UV range. The  
154 amount of phage particles per ml can be calculated according to the following formula:

$$155 \quad \text{phages / ml} = \frac{(OD_{269} - OD_{320}) * 6e16}{bp},$$

156 where OD<sub>269</sub> and OD<sub>320</sub> stand for optical density at 269 and 320 nm and bp stands for  
157 number of base pairs per phage.

158 This method is based on small-scale precipitation of phages by single PEG-  
159 precipitation. After centrifuging 1500 µl of the phage containing overnight culture at  
160 13,000 ×g for 2 min, 1200 µl of the supernatant was mixed with 300 µl PEG/NaCl 5×  
161 and incubated on ice for 30 min. Afterwards phage particles were pelleted by two  
162 rounds of centrifugation at 13,000 ×g for 2 min, resuspended in 120 µl TBS 1× and  
163 incubated on ice. After one hour the suspension was cleaned by centrifugation at 13,000  
164 ×g for 1 min and absorbance was measured at 269 and 320 nm.

165 Quantification of filamentous phages using spectrometry is likely to be erroneous if  
166 viral load is low. Therefore, we additionally quantified phage prevalence/ phage  
167 extinction in each of the populations on every second transfer day by standard spot  
168 assays with a serial dilution (10<sup>-1</sup> to 10<sup>-6</sup>) on the ancestral host (for details see  
169 (Wendling, Piecyk et al. 2017)) and measured until which dilution the typical opaque  
170 zones of reduced bacterial growth were visible.

171

172 (d) Measuring phage-resistance

173 We measured the rate of phage resistance evolution among bacteria against the  
174 ancestral phage by determining the reduction in bacterial growth rate (RBG) imposed by

175 the phage, adapted from (Poullain, Gandon et al. 2008) with some modifications  
176 according to (Goehlich, Roth et al. 2019). Twenty-four random colonies from each  
177 population from transfer T0, T1, T2, T6, T12, T18, T24, and T30 were introduced into  
178 96-well microtiter plates containing Medium101 at a concentration of  $5 \times 10^6$  cells/ml  
179 and inoculated with  $\sim 2.5 \times 10^6$  PFU/ml of each of the two ancestral phages used for the  
180 selection experiment or without phage (control). Absorbance at 600 nm was measured  
181 using an automated plate reader (TECAN infinite M200) at T0 and again after 20 hours  
182 of static incubation at 25°C. The reduction in bacterial absorbance 'RBG' was  
183 calculated according to the following formula:

$$184 \quad RBG = \frac{OD600(t=20) - OD600(t=0)[Phage]}{OD600(t=20) - OD600(t=0)[Control]}$$

185 where OD stands for optical density at 600nm.

186

187 (e) Frequency of prophage carriage

188 On transfer T0, T1, T2, T6 followed by every sixth transfer we measured the  
189 frequency of phage carriage of 24 random clones per population using standard PCR.  
190 Primers (VALGΦ8\_Forward TGGAAGTGCCAAGGTTTGGT, VALGΦ8\_Revers  
191 GAAGACCAGGTGGCGGTA AAA) that specifically target the co-evolving *Vibrio*  
192 phage VALGΦ8 have been designed using NCBI Primer-BLAST webpage  
193 (<http://www.ncbi.nlm.nih.gov/tools/primer-blast/>). Note, while this primer-pair detects  
194 the presence/ absence of *Vibrio* phage VALGΦ8, it does not confirm chromosomal  
195 integration of the respective phage. Glycerol stocks were inoculated overnight (25°C,  
196 180 rpm) in Medium 101 and subsequently diluted (1:10) in HPLC purified H<sub>2</sub>O and  
197 frozen at -80° C. One µl of this suspension was used as DNA template in the PCR  
198 assay. Reaction comprised 1 µl Dream Tag Buffer, 0.1 µl Dream Tag DNA polymerase  
199 (Thermo Scientific, USA), 4.9 µl H<sub>2</sub>O, 1 µl dNTPs [5 mM] and 1 µl of each primer [50



200  $\mu\text{M}$ ]. The amplification program used consisted of: (i) 3 min at 95° C, (ii) 35 cycles of  
201 45 sec at 95° C, 30 sec at 63° C, 45 sec at 72° C, (iii) 7 min at 72° C. Afterwards, 5  $\mu\text{l}$   
202 of each reaction was mixed with 2  $\mu\text{l}$  loading dye (10 $\times$ ) and loaded onto a 1.2% agarose  
203 gel dissolved in 1 $\times$ TAE gel buffer. GeneRuler Express DNA-ladder was used as size  
204 marker. Agarose gels were run 15 min at 70 V in 0.5 $\times$  TAE running buffer and  
205 subsequently stained with ethidium bromide for 10 min. DNA was visualized using UV  
206 light and documentation took place using Intas Gel iX20 Imager. Phage presence was  
207 recorded positive if a PCR product of 1400 bp was visible.

208 For all subsequent assays, we randomly picked one phage-resistant clone with a  
209 positive PCR product (later called:  $\Phi$ -carrier) and one phage-resistant clone with a  
210 negative PCR product (later called: mutant) from each phage-evolved population as  
211 well as two randomly selected non-resistant clones from the control populations.

212

#### 213 (f) Competition experiments

214 To determine differences in fitness between both resistance forms, we measured the  
215 competitive fitness of  $\Phi$ -carrier relative to mutants. Each competition culture was done  
216 in triplicates as described in (Harrison, Guymer et al. 2015). In brief, overnight cultures  
217 of both competing strains (of which one was labelled with a GFP-marker) were mixed  
218 1:1 and 60  $\mu\text{l}$  of this mixture was inoculated to 6 ml Medium 101 to initiate each  
219 competitive culture. After 24 hours, fitness was estimated by means of flow cytometry  
220 (FACS-Caliburm Becton & Dickinson, Heidelberg, GER), where absolute fluorescent  
221 cells and non-fluorescent cells were calculated. Competitive fitness was estimated as the  
222 ratio in Malthusian parameters (Lenski, Rose et al. 1991):

223

$$224 \quad W = \ln(\text{abundance}_{t=24}/\text{abundance}_{t=0})_{\text{competitor1}} / \ln(\text{abundance}_{t=24}/\text{abundance}_{t=0})_{\text{competitor2}}$$

225

226 (g) Bacterial growth rate and phage production

227 To determine fitness parameters that could explain observed differences in  
228 competitive fitness we additionally quantified bacterial growth rate ( $\mu$ ) by means of 24-  
229 hour growth curves and phage production using PEG precipitation (as described in (c))  
230 of the same clones used for the competition assays (i.e., one  $\Phi$ -carrier and one mutant  
231 from each phage-treated population and two random phage-susceptible clones from the  
232 control populations plus the ancestor).

233

234 (h) Whole genome sequencing

235 We used a combination of long- and short read sequencing to obtain complete  
236 genomes of the same clones from the assays above, i.e., one  $\Phi$ -carrier and one mutant  
237 from each phage-treated population and one random phage-susceptible clone from each  
238 control population, which corresponds to six independently evolved clones per  
239 treatment and resistance form. High molecular weight DNA was extracted from cell  
240 pellets of overnight cultures following the protocol for gram negative bacteria from the  
241 DNeasy Blood & Tissue Kit (Qiagen, Hilden, Germany). For long-read sequencing the  
242 library was prepared using Pacific Bioscience protocol for SMRTbell™ Libraries using  
243 PacBio® Barcoded Adapters for Multiplex SMRT® Sequencing. To do so, DNA was  
244 fragmented into 10kb fragments using g-tubes (Covaris). Samples were pooled during  
245 library preparation aiming for equimolar pooling and library size was selected using  
246 Ampure beads. The library was sequenced on a PacBio Sequel instrument using Sequel  
247 Polymerase v3.9, SMRT cells v3 LR and Sequencing chemistry v3.0. Loading was  
248 performed by diffusion. Two SMRT cells were sequenced (movie time: 600min, pre-  
249 extension time: 240 min). Reads were demultiplexed using Barcoding pipeline on

250 SMRT Link (v6.0.0.47841, SMRT Link Analysis Services and GUI v6.0.0.47836) with  
251 40 as a minimum barcode score.

252 Short-read sequencing was done on an Illumina 2500 platform and resulted in a  
253 minimum average coverage of 88× per strain (coverage range was from 88× to 157×).  
254 The reads were quality controlled using the program FastQC Version 0.11.5. High  
255 quality reads were used for hybrid assemblies as well as for single nucleotide variation  
256 analysis.

257 Genome assemblies were performed in two different ways: In a first approach  
258 assemblies were performed using the Unicycler pipeline (v0.4.7) and the programs  
259 within. Assemblies were performed as hybrid assemblies using short-read and long read  
260 data in a short-read first approach. In brief: An initial assembly was performed with  
261 short-read only using spades (v3.13.0) as provided within Unicycler. The resulting  
262 contigs were co-assembled with long-read data using miniasm (v0.2-r168) and curated  
263 using the racoon software. This step resulted in complete closed replicons. All long  
264 reads were mapped and integrated into the contigs. All replicons were polished using  
265 the Pilon software (1.22) to clear any small-scale assembly errors. Finally, all replicons  
266 were rearranged according to the origin of replication. The assembly for the ancestral  
267 K01M1 strain, as has been described in (Wendling, Piecyk et al. 2017) was performed  
268 following the Hierarchical Genome Assembly Process (HGAP3) protocol, developed  
269 for Pacific Biosciences Single Molecule Real-Time (SMRT) sequencing data (Chin,  
270 Alexander et al. 2013). HGAP is available for use within PacBio's Secondary Analysis  
271 Software SMRTPortal. Methodically, the longest subreads of a single SMRT Cell  
272 (usually 25x genome coverage, e.g., 25 x 5 Mbp = 125 Mbp) are being chosen to be  
273 error-corrected with "shorter" long reads in a process named preassembly. Hereby, a  
274 length cut-off is computed automatically separating the "longer" reads (for genome

275 assembly) and the “shorter” reads (for error-correction). The level of error-correction is  
276 being estimated with a per-read accuracy of 99%. Finally, error-corrected long read data  
277 is being assembled with Celera Assembler 7.0.

278

279 (i) SNV analysis and reconstruction of infecting phages

280 All short-read sequences were mapped on a high quality closed reference genome  
281 of *Vibrio alginolyticus* Strain K01M1 (Wendling et al., 2017) using Bowtie2  
282 (Langmead & Salzberg, 2012). Single nucleotide variation (SNV) analysis was done  
283 using the Breseq pipeline as described in Deatherage & Barrick, (Deatherage & Barrick,  
284 2014). Assembly of reads were done using Spades (Bankevich et al., 2012). Whole  
285 genome alignments have been calculated using the MAUVE aligner (Darling, Mau, &  
286 Perna, 2010). Presence of infecting phage genomes were determined by assembling  
287 NGS-reads that did not map on the K01M1 genome in a bowtie2 mapping using Spades.  
288 The resulting contigs were annotated based on the review of Mai-Prochnow on  
289 filamentous phages (Mai-Prochnow et al., 2015). The genomes of the evolved phages  
290 were compared to the infecting phage genomes *Vibrio* phage VALGΦ8 as well as to the  
291 genome of the resident prophage *Vibrio* phage VALGΦ6 from the challenged strain  
292 K01M1 using BLAST and Easyfig 2.1 (Sullivan, Petty, & Beatson, 2011).

293 Coverage analysis of phage derived short reads were mapped against the complete  
294 ancestral genome of *V. alginolyticus* K01M1 (NCBI accession numbers CP017889.1,  
295 CP017890.1) as well as the phage genomes VALGΦ6 and VALGΦ8 using Bowtie2.  
296 The resulting coverage data was visualized using Artemis (Version) and compared for  
297 differences in coverage. Coverage analysis of Sequel long-reads was performed within  
298 the “Base Modification Analysis” within SMRTlink 8 using the same reference as stated

299 above or additionally including the infecting phage. Coverage data was visualized  
300 within SMRTlink.

301

302 (j) Statistical analyses

303 All statistics were performed in the R 3.1.2 statistical environment (Team 2011).

304 For all analysis aimed to compare the two different phage treatments to one another,

305 control populations (i.e., those that evolved without phages) were excluded. When

306 comparing temporal dynamics between phage-treatments, we excluded the starting

307 time-point T0, because these measurements were taken before phages were added to the

308 populations.

309

310 *Bacteria and phage dynamics*

311 Bacterial and phage densities were analysed over time using a generalized least

312 squares model to control for autocorrelation of residuals over time using the gls function

313 (package nlme) with phage treatment, transfer as categorical variable as well as their

314 interaction as fixed effect.

315 We considered phages to be prevalent in the population if opaque zones of reduced

316 growth were visible during standard spot assays. Phage prevalence was subsequently

317 quantified by a serial dilution, which were assigned with invers values (i.e., if reduced

318 growth zones were visible up to dilution of  $10^{-6}$  we assigned to it a value of 7, whereas

319 if they were only visible on an undiluted spot, we assigned to it a value of 1, if no zone

320 of reduced growth was visible it was scored as 0). Phage extinction events across phage-

321 treatments were analysed using a log-rank test.

322

323 *Measuring bacterial resistance*

324 We observed a bimodal histogram on all RBG values with a local minimum at RBG  
325 = 0.82 (Figure S1). Thus, we considered an infection as positive if  $RBG < 0.82$ . The  
326 proportion of resistant clones per population as well as the proportion of clones that  
327 tested positive for PCR (targeting the co-evolving phage) were analysed using a  
328 generalized linear model with a binomial error distribution using the glm function  
329 (package lme4) with phage treatment, transfer and their interaction as fixed effect.

330

### 331 *Fitness effects*

332 We determined differences in relative fitness between MSHA-mutants and phage-  
333 carrier using a linear model with resistance mechanisms and GFP-label and the  
334 interaction thereof as fixed effects. To determine differences in the amount of free  
335 phages and in growth rates produced between ancestral strains and evolved strains and  
336 between both resistance forms, we used Welch's pairwise *t*-tests with sequential  
337 Bonferroni correction. We further performed a Pearson's correlation analysis to  
338 determine whether phage production impacted bacterial growth rates.

339

## 340 RESULTS

### 341 *Bacterial densities*

342 We propagated six replicate populations of *Vibrio alginolyticus* K01M1 in the  
343 presence of two closely related filamentous phages, that differed in their virulence:  
344 VALGΦ8<sub>K04M5</sub> (high virulence), VALGΦ8<sub>K04M1</sub> (low virulence) - or without a phage  
345 (control) over 30 serial transfers for ~240 bacterial generations. Phages reduced  
346 bacterial densities in both phage-containing treatments by several orders of magnitude  
347 compared to control populations (Figure 1a). However, the immediate reduction  
348 (measured 24 hours post infection [hpi]) in bacterial density was stronger in populations  
349 co-evolving with high virulent phages than with low virulent phages (Figure 1a),  
350 confirming that VALGΦ8<sub>K04M5</sub> is more virulent than VALGΦ8<sub>K04M1</sub>. Over time,  
351 however, the densities of bacterial populations co-evolving with high virulent phages  
352 recovered three times faster than populations co-evolving with low virulent phages  
353 (significant phage:transfer interaction in gls-model:  $F_{15,186}=6.58$ ,  $p<0.001$ , Figure 1a).

354

### 355 *Phage densities*

356 In both phage containing treatments, phages, that had initially been added at a titre  
357 of  $\sim 5 \times 10^{10}$  PFU/ml, amplified massively during the first couple of bacterial generations  
358 and reached levels of  $3.01 \times 10^{12}$  PFU/ml (VALGΦ8<sub>K04M5</sub>) 24 hpi and  $2.83 \times 10^{12}$  PFU/ml  
359 (VALGΦ8<sub>K04M1</sub>) 48 hpi (Figure 1b), before production decreased to levels comparable  
360 to phage-free populations. These data suggest that the strong reduction in bacterial  
361 densities at the beginning of the experiment (Figure 1a) directly resulted from the  
362 production of viral particles (Figure 1b).

363 We further observed that phage extinction events differed significantly between  
364 treatments (log-rank test:  $\text{Chisq}_1=4.9$ ,  $p=0.03$ ). High virulent phages went extinct in five

365 out of six populations after 12 transfers, whereas low virulent phages survived in four  
366 out of six populations until transfer 28, before they finally went extinct on transfer 30  
367 (Figure S2). To understand the evolutionary drivers behind these different selection  
368 dynamics against both phages, we next isolated 24 random clones per population from  
369 seven selected transfers and quantified the fraction of phage-resistant clones per  
370 population.

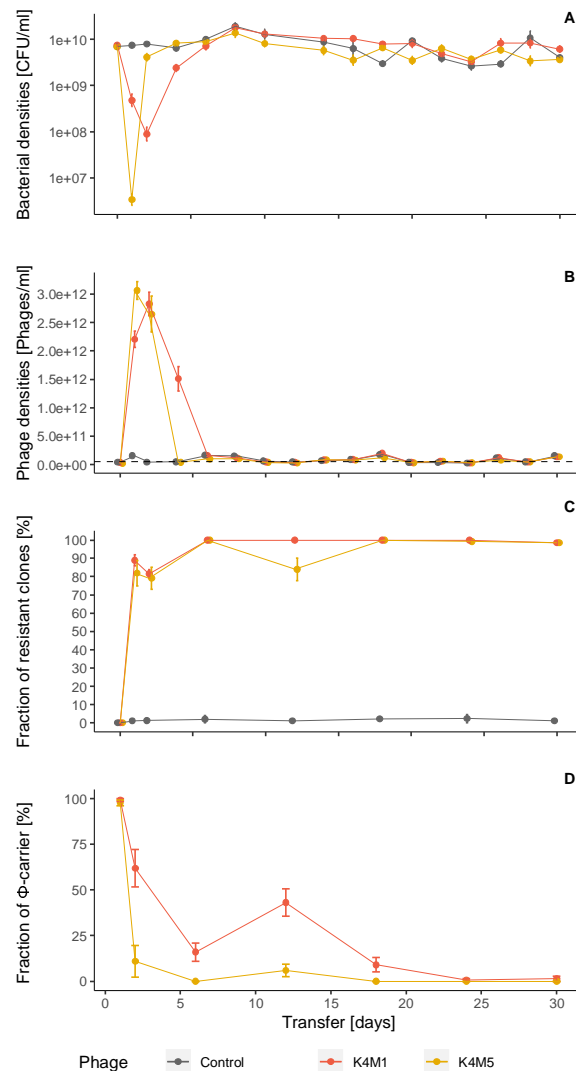

371

372 **Figure 1 Population dynamics over 30 transfers of bacteria-phage co-evolution.** (a) Bacteria in  
373 CFU/ml, (b) Phages in PFU/ml, the grey dashed line represents the detection limit for quantifying  
374 filamentous phages using spectrophotometry, (c) Fraction of phage-resistant clones (n=24), and (d)  
375 Fraction of  $\Phi$ -carrier within phage-resistant clones. Fractions are based on 24 random clones per replicate  
376 population. In all panels, data are represented as mean of six replicate populations per treatments, error  
377 bars represent standard errors. Colours correspond to one of three phage-treatments, low virulent  
378 VALG $\Phi$ <sub>K04M1</sub> (red), high virulent VALG $\Phi$ <sub>K04M5</sub> (yellow), no phage (grey).



379

380 *Φ*-carrier buy time for phage-resistant mutants to rise and sweep through fixation

381 Different mechanisms can confer resistance to filamentous vibriophages, such as  
382 superinfection exclusion, (i.e. when the same phage is already present in the host cell  
383 (Wendling, Piecyk et al. 2017)) or surface-receptor modifications, in particular at the  
384 mannose-sensitive hemagglutinin (MSHA) type IV pilus, that prevents filamentous  
385 vibriophages from entering the host (Jouravleva, McDonald et al. 1998). To determine  
386 the underlying genetic basis of the resistance mechanism in the present study, we first  
387 selected 24 random clones from each population for a PCR-based analysis to determine  
388 presence/ absence of the co-evolving phage. Presence of the co-evolving phage confers  
389 resistance through superinfection exclusion. Absence of the co-evolving phage suggests  
390 the presence of other resistance mechanisms. This was followed by whole genome  
391 sequencing (WGS), for which we randomly selected two clones from each population  
392 (one PCR-positive and one PCR-negative clone). WGS analysis confirmed, that clones  
393 with a positive PCR result (i.e., *Φ*-carrier), contained the respective co-evolving phage.  
394 Interestingly, in all sequenced PCR-positive clones the co-evolving phage existed  
395 exclusively episomal, irrespective of its infection mode in its ancestral host (integrative  
396 VALG $\Phi$ 8<sub>K04M5</sub> or episomal VALG $\Phi$ 8<sub>K04M1</sub>). Even though the ancestral K01M1 strain  
397 had at least two known integration sites (Supplementary material Figure S3),  
398 VALG $\Phi$ 8<sub>K04M5</sub> which also exists integrative in several other environmental *Vibrio*  
399 *alginolyticus* isolates (Chibani, Hertel et al. 2020), was not able to integrate into the  
400 chromosome of K01M1. Moreover, we observed no genomic changes between ancestral  
401 and evolved versions of the two co-infecting phages (VALG $\Phi$ 8<sub>K04M1</sub> and  
402 VALG $\Phi$ 8<sub>K04M5</sub>) as well as between the integration sites of the ancestral and evolved

403 clones. This suggests that the failure to integrate is not a result of genomic changes in  
404 the phage nor the integration site that would have prevented phage integration.

405 Small nucleotide variant (SNV) analysis of the WGS data from all clones that co-  
406 evolved with a phage relative to the ancestor revealed no loci with mutations on  
407 chromosome 2 and the plasmid pI9064. On chromosome 1 we identified 12 loci with  
408 mutations that were not present in clones from the control treatment. Of these 12 loci,  
409 three were randomly distributed across PCR-positive and PCR-negative clones while  
410 the remaining nine loci were exclusive to PCR-negative clones suggesting a potential  
411 role in phage resistance. Of these nine loci, eight had substitutions, duplications,  
412 insertions or deletions in four different proteins belonging to the MSHA type IV pilus  
413 operon (*mshL*, *mshE*, *mshG*, *KO1M1\_28150*; Figure 2a/ Table S1). Of these, five caused  
414 severe frameshift mutations that presumably have a high impact on the function of this  
415 protein. The observed variations occurred in 8/12 PCR-negative clones which suggests  
416 strong parallel evolution of phage resistance. Most of the detected mutations fall into  
417 genes within the MSHA operon which are highly conserved across *Vibrio* clades  
418 (Figure 2b). This suggests, that, similar to other vibrios (Jouravleva, McDonald et al.  
419 1998), the MSHA type IV pilus plays an important role in resistance against the  
420 filamentous *Vibrio* phage VALGΦ8. Note, a search of all assembled genomes for  
421 CRISPR associated genes as well as for CRISPR array like repetitive sequence patterns  
422 did not yield any results. All PCR-negative phage resistant clones are from here  
423 onwards referred to as MSHA-mutants.

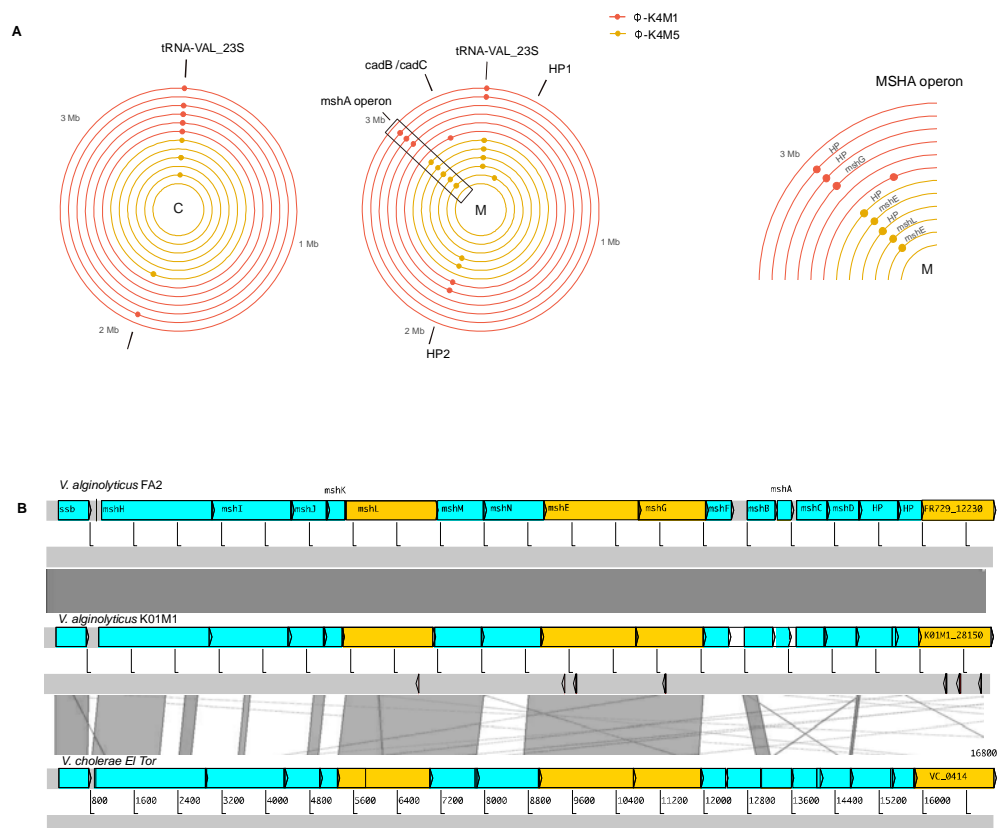

424  
 425 **Figure 2** (A) Genetic loci on chromosome 1 under positive selection as indicated by parallel genomic  
 426 evolution in populations co-evolving with phages: left:  $\Phi$ -carrier; middle: mutants; right zoom into  
 427 MSHA-operon region from mutants. Only loci which are not present in control populations are shown.  
 428 Concentric circles correspond to one clone isolated from either the VALG $\Phi$ <sub>K04M5</sub> treatments (5 inner  
 429 circles, yellow) or the VALG $\Phi$ <sub>K04M1</sub> treatment (six outer circles, red). Each coloured point corresponds  
 430 to one mutation event on the respective clone. HP corresponds to locus tag K01M1\_28150. For more  
 431 detailed information on the underlying mutation see Table S1.  
 432 (B) Structure of the MSHA-operon and comparative genomics comprising MSHA operons from *V.*  
 433 *alginolyticus* FA2 (top), *V. alginolyticus* K01M1 (middle), and *V. cholerae* El Tor (bottom). Similarity  
 434 between regions is indicated by dark grey blocks, genes with detected mutations are marked in orange,  
 435 detected mutations are marked as arrows below *V. alginolyticus* K01M1.  
 436

437 The proportion of phage-resistant clones per population increased rapidly within the  
 438 first 24 hours (Figure 1c). This was true for both phage treatments in which we observed  
 439 almost 100% phage-resistant clones after 24 hours. After 24 hours,  $\Phi$ -carriers, were the  
 440 dominating form among the resistant clones (Figure 1d), suggesting that superinfection  
 441 exclusion is a fast way to acquire phage resistance. However, 48 hours post infection  
 442 (i.e., on transfer 2) the proportion of  $\Phi$ -carriers declined, and the MSHA-resistant  
 443 mutant started to sweep through the populations, suggesting that MSHA-resistant

444 mutants were significantly fitter than  $\Phi$ -carriers. MSHA-resistant mutants increased  
445 significantly faster in populations co-evolving with high virulent, compared to low  
446 virulent phages (Figure 1d, significant phage:transfer interaction:  $F_{6,60}=10.18$ ,  $p<0.001$ ).  
447 While  $\Phi$ -carriers were driven to extinction by MSHA-mutants in all six populations co-  
448 evolving with high virulent phages 12 days post infection,  $\Phi$ -carriers were able to  
449 persist, even though at very low frequencies, in five out of six populations co-evolving  
450 with low virulent phages until the end of the experiment (i.e., transfer 30). These data  
451 suggest that the fitness benefit of MSHA-mutants relative to phage-carriers was higher  
452 in populations co-evolving with high virulent phages. This was confirmed in a separate  
453 pairwise competition experiment, in which we quantified fitness advantages of MSHA-  
454 mutants relative to  $\Phi$ -carriers (Figure S4). Again, the fitness benefit of MSHA-mutants  
455 relative to  $\Phi$ -carriers was higher when bacteria carried the high virulent phage  
456 compared to carriers of the low virulent phage (significant treatment term in linear  
457 model with treatment, GFP-label and the interaction thereof as fixed factors:  $F_{1,8}=18.63$ ,  
458  $p=0.003$ , Table S2). These results support the dynamics observed in the selection  
459 experiment, (i.e., VALG $\Phi_{8K04M5}$ -carriers went extinct significantly faster than  
460 VALG $\Phi_{8K04M1}$ -carriers), confirmed that  $\Phi$ -carriers can be rapidly outcompeted by  
461 MSHA-mutants and demonstrate that the strength of selection is higher in high virulent  
462 infections.

463       Given the rapid increase of phage-resistance in the co-evolving populations it is  
464 perhaps surprising that the recovery of bacterial populations back to initial densities  
465 (i.e., before phages were added to the populations) did not correlate with the absolute  
466 number of phage-resistant clones per populations (Pearson's correlation:  $r=-0.17$ ,  $t_{78}=-$   
467  $1.55$ ,  $p=0.13$ ). Moreover, bacterial population densities are negatively correlated with  
468 the number of  $\Phi$ -carriers per population (Pearson's correlation without zero inflation  $\Phi$ -

469 K04M1:  $r=0.69$ ,  $t_{21}=-4.38$ ,  $p<0.001$ ,  $\Phi$ -K04M5:  $r=0.92$ ,  $t_7=-6.29$ ,  $p<0.001$ ; Figure S5).  
470 This implies that, even though the majority of the clones in the populations were  
471 resistant to the co-evolving phages, bacterial populations were not able to recover as  
472 long as the dominating mechanism of phage-resistance was superinfection exclusion.  
473 Only when the fraction of  $\Phi$ -carriers declined, and the fraction of MSHA-mutants  
474 increased, bacterial populations started to recover. Accordingly, superinfection  
475 exclusion might be a fast way for a bacterial population to gain resistance against  
476 filamentous phages. By doing so,  $\Phi$ -carriers can buy time for resistance mutations to  
477 arise and sweep through populations. However, if filamentous phages do not provide a  
478 selective benefit,  $\Phi$ -carriers and ultimately the phage will be lost from the population,  
479 once a phage resistant mutant emerges. To further quantify the parameters that influence  
480 the increased fitness of MSHA-mutants relative to  $\Phi$ -carriers, we measured the amount  
481 of free phages and the absolute growth rate of selected clones.

482

#### 483 *Production of free phages is costly*

484 Filamentous phages can produce very high titres in the initial phase of an infection  
485 (Lerner and Model 1981), which often results in a strong reduction in bacterial growth  
486 and thus high fitness costs. To test whether this observation is true for our system, we  
487 quantified differences in phage production and tested if phage production impairs  
488 bacterial growth. While  $\Phi$ -carrier that acquired low virulent phages produced  
489 approximately the same number of free phages as in their original host K04M1 (non-  
490 significant paired  $t$ -test:  $t_{4,2}=-1.18$ ,  $p=0.3$ , Figure S6a), we observed a significant  
491 increase in phage production for high virulent phages once they infected the co-evolving  
492 host K01M1 compared to their original host K04M5 (paired  $t$ -test:  $t_5=-4.31$ ,  $p=0.008$ ).  
493 Also, VALG $\Phi$ <sub>8K04M5</sub>-carriers produced significantly more free phages than

494 VALG $\Phi$ 8<sub>K04M1</sub>-carriers (paired *t*-test:  $t_{5,61}=-3.36$ ,  $p=0.017$ ).

495 Direct comparisons of growth rates among evolved clones revealed a significant  
496 difference between both resistance forms with  $\Phi$ -carrier growing on average slower  
497 than MSHA-mutants (VALG $\Phi$ 8<sub>K04M5</sub>: paired *t*-test:  $t_{6,61}=-3.39$ ,  $p=0.006$ ;  
498 VALG $\Phi$ 8<sub>K04M1</sub>: paired *t*-test:  $t_{7,5}=-3.32$ ,  $p=0.01$ , Figure S6b). We further observed that  
499 phage production significantly impaired bacterial growth (significant negative  
500 correlation between the amount of produced phages and bacterial growth rate Figure 3).  
501 This might explain the different dynamics between both phage-treatments in the  
502 selection experiment. Accordingly, high virulent phages impose a greater cost to their  
503 host than low virulent phages (production of more free phage particles resulted in a  
504 stronger reduction of bacterial growth), leading to a stronger selection against bacteria  
505 carrying high virulent phages and ultimately a faster extinction. This further explains  
506 the earlier stop of the massive initial phage amplification for populations co-evolving  
507 with high virulent phages and the faster recovery of the bacterial population to pre-  
508 infection densities.

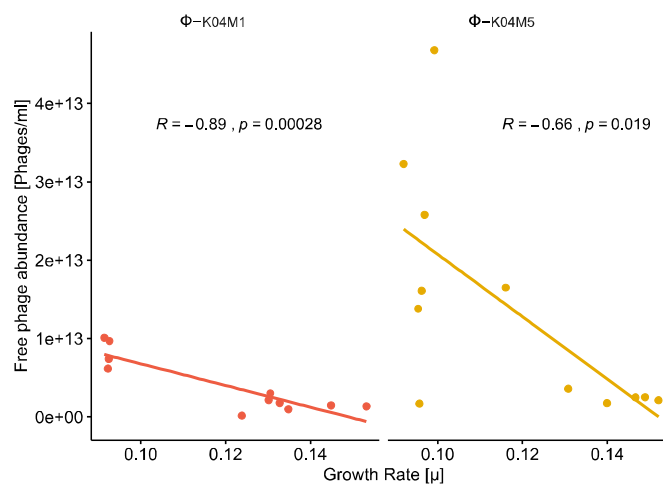

509

510 **Figure 3** Correlation between bacterial growth rate [ $\mu$ ] and production of free phages measured as  
511 PFU/ml per clone (left VALG $\Phi$ 8<sub>K04M1</sub>, right: VALG $\Phi$ 8<sub>K04M5</sub>).

512

## 513 **DISCUSSION**

514       We hypothesised that selection for resistance evolution in viral infections will be  
515 stronger for high virulent compared to low virulent viral infections. Resistance against  
516 filamentous phages can emerge via two ways: (1) super-infection exclusion mediated by  
517 the presence of the infecting phage in the bacterial host cell, or (2) molecular resistance  
518 evolution, for instance surface-receptor modifications, which prevent phages from  
519 entering host cells. Here, we show that upon phage infection, the first way of resistance  
520 acquisition was by super-infection exclusion, which occurred at a similar rate in both  
521 treatments. However, over time, these phage-carrying clones were rapidly replaced by  
522 phage resistant mutants. This replacement happened significantly faster in high virulent  
523 compared to low virulent infections, suggesting that selection for molecular resistance  
524 evolution is stronger in high virulent infection. Ultimately this faster resistance  
525 evolution caused a faster extinction of phages, which were not able to co-evolve in  
526 order to overcome evolved host-resistance, and a shorter epidemic.

527       At least two mutually non-exclusive scenarios can explain why mutants became the  
528 dominant form in our experiments: (1) cost of resistance, and (2) stability of resistance.  
529 While resistance acquisition is faster via super-infection exclusion than by molecular  
530 changes, our data suggest that this process is less stable. That is because in episomal,  
531 non-integrative phage infections some bacterial daughter cells will not inherit the  
532 infecting phage due to spontaneous segregation-loss, rendering them once again  
533 susceptible to subsequent infections. In contrast, molecular resistance evolution is more  
534 stable and due to their higher fitness, those resistant clones can rapidly sweep through  
535 the population and reach fixation.

536       The rapid extinction of phages and phage-carriers in our experiment raises the  
537 questions, why filamentous phages are omnipresent in nature (Roux, Krupovic et al.

2019), including in environmental *Vibrio* strains closely related to our model strain K01M1 (Chibani, Hertel et al. 2020). In other words, what selects for the presence of filamentous phage-carriers in nature? In some cases filamentous phages can contribute positively to the host's evolutionary fitness (Hay and Lithgow 2019) through lysogenic conversion, i.e., by providing the bacterial host with new phenotypes induced by phage-encoded proteins (Waldor and Mekalanos 1996). In certain environments this may be beneficial enough to outweigh the costs, resulting in a successful chronic infection. Among those, the most prominent example is CTX $\phi$ , which carries the genes for the cholera toxin (Waldor and Mekalanos 1996). For the phage from our study, however, we can only speculate, that its presence provides a fitness advantage in the natural environment, which we did not capture in our laboratory experiments. These might include for instance advantages during colonization (Davis and Waldor 2003), or increased stress tolerance (Yu, Chen et al. 2015). The annotation and comparative genomic analyses of VALG $\Phi$ 8 based on the available information in today's databases, does however not reveal any known-accessory traits that would support this hypothesis (Chibani, Hertel et al. 2020). Answers might come from co-evolution experiments in more natural environments, for instance inside the gut of marine animals. Such results could then be used to predict the chances of establishing a persistent chronic infection which we assume is likely to depend on ecological and evolutionary factors that determine the net-benefit of the phage on its host (Bull, Molineux et al. 1991, Shapiro, Williams et al. 2016, Shapiro and Turner 2018).

Ecological benefits of filamentous phages can arise during species interactions, e.g., by protecting hosts against infection by other phages (superinfection exclusion), by acting as decoys for mammalian immunity (Sweere, Van Belleghem et al. 2019), or from interactions with the abiotic environment e.g., through stress tolerance (Yu, Chen



563 et al. 2015). Evolutionary benefits include increased mutation supply, and lysogenic  
564 conversion (Waldor and Mekalanos 1996). However, filamentous phages can also be  
565 costly, for instance through disruption of functional host genes following chromosomal  
566 insertion or a fitness loss due to increased transcriptional load, in particular for phages  
567 that reproduce at high frequencies. We predict that the net-benefit of a filamentous  
568 phage on its host determines the co-evolutionary outcome of both species. If costs  
569 associated with phage carriage exceed the benefits, we expect that phages will be  
570 quickly lost from the population as we have seen in the present experiment. By contrast,  
571 if phages increase their host's fitness we expect successful chronic infections.

572

#### 573 Conclusion

574 Consistent with our hypothesis we could show that selection for resistance  
575 evolution is stronger against high virulent compared to low virulent viral infections.  
576 Accordingly, high virulent infections will be cleared faster leading to shorter epidemics  
577 which will additionally limit the transmission success of high virulent viruses. However,  
578 since the virus in our study failed to co-evolve, this system should not be used as a  
579 general model to study resistance evolution. Other outcomes in terms of resistance  
580 evolution are to be expected, if viruses co-evolve with their hosts. It might be possible  
581 that co-evolution of high virulent viruses is constrained as they have much less time to  
582 acquire the necessary mutations that would allow them to overcome host resistance. If  
583 this holds true, natural selection might favour low virulent variants, that are able to  
584 persist longer inside an organism which not only increases their transmission potential  
585 but also their time to co-evolve. Future work will focus on the impact of virulence on  
586 the evolutionary potential during host-virus co-evolution.

587 **Acknowledgements:** We thank Katja Trübenbach, Veronique Merten, Silke-Mareike  
588 Merten and Kim-Sara Wagner for their support in the laboratory.

589

590 **Funding:** This project was funded by two grants from the DFG [WE 5822/ 1-1], [WE  
591 5822/ 1-2] within the priority programme SPP1819 given to CCW and OR and a DFG  
592 grant within the Cluster of Excellence 80 “The Future Ocean” given to CCW.

593

594 **References**

595

596 Anderson, R. M. and R. M. May (1982). "Coevolution of hosts and parasites."  
597 Parasitology **85 (Pt 2)**: 411-426.

598 Bull, J. J., I. J. Molineux and W. R. Rice (1991). "Selection of Benevolence in a Host-  
599 Parasite System." Evolution **45(4)**: 875-882.

600 Chibani, C. M., R. Hertel, M. Hoppert, H. Liesegang and C. C. Wendling (2020).  
601 "Closely Related *Vibrio alginolyticus* Strains Encode an Identical Repertoire of  
602 Caudovirales-Like Regions and Filamentous Phages." Viruses **12(12)**.

603 Chibani, C. M., O. Roth, H. Liesegang and C. C. Wendling (2020). "Genomic variation  
604 among closely related *Vibrio alginolyticus* strains is located on mobile genetic  
605 elements." BMC Genomics **21(1)**: 354.

606 Chin, C. S., D. H. Alexander, P. Marks, A. A. Klammer, J. Drake, C. Heiner, A. Clum,  
607 A. Copeland, J. Huddleston, E. E. Eichler, S. W. Turner and J. Korlach (2013).  
608 "Nonhybrid, finished microbial genome assemblies from long-read SMRT sequencing  
609 data." Nat Methods **10(6)**: 563-569.

610 Davis, B. M. and M. K. Waldor (2003). "Filamentous phages linked to virulence of  
611 *Vibrio cholerae*." Curr Opin Microbiol **6(1)**: 35-42.

612 Ebert, D. (1994). "Virulence and Local Adaptation of a Horizontally Transmitted  
613 Parasite." Science **265(5175)**: 1084-1086.

614 Fenner, F. and I. D. Marshall (1957). "A comparison of the virulence for European  
615 rabbits (*Oryctolagus cuniculus*) of strains of myxoma virus recovered in the field in  
616 Australia, Europe and America." J Hyg (Lond) **55(2)**: 149-191.

617 Goehlich, H., O. Roth and C. C. Wendling (2019). "Filamentous phages reduce bacterial  
618 growth in low salinities." R Soc Open Sci **6(12)**: 191669.

619 Harrison, E., D. Guymer, A. J. Spiers, S. Paterson and M. A. Brockhurst (2015).  
620 "Parallel Compensatory Evolution Stabilizes Plasmids across the Parasitism-Mutualism  
621 Continuum." Current Biology **25(15)**: 2034-2039.

622 Herre, E. A. (1993). "Population structure and the evolution of virulence in nematode  
623 parasites of fig wasps." Science **259(5100)**: 1442-1445.

624 Jouravleva, E. A., G. A. McDonald, J. W. Marsh, R. K. Taylor, M. Boesman-  
625 Finkelstein and R. A. Finkelstein (1998). "The *Vibrio cholerae* mannose-sensitive  
626 hemagglutinin is the receptor for a filamentous bacteriophage from *V. cholerae* O139."  
627 Infect Immun **66(6)**: 2535-2539.

- 628 Lenski, R. E., M. R. Rose, S. C. Simpson and S. C. Tadler (1991). "Long-Term  
629 Experimental Evolution in Escherichia-Coli .1. Adaptation and Divergence during 2,000  
630 Generations." American Naturalist **138**(6): 1315-1341.
- 631 Lerner, T. J. and P. Model (1981). "The "steady state" of coliphage f1: DNA synthesis  
632 late in infection." Virology **115**(2): 282-294.
- 633 Mai-Prochnow, A., J. G. Hui, S. Kjelleberg, J. Rakonjac, D. McDougald and S. A. Rice  
634 (2015). "'Big things in small packages: the genetics of filamentous phage and effects on  
635 fitness of their host'." FEMS Microbiol Rev.
- 636 May, R. M. and R. M. Anderson (1983). "Epidemiology and genetics in the coevolution  
637 of parasites and hosts." Proc R Soc Lond B Biol Sci **219**(1216): 281-313.
- 638 Messenger, S. L., I. J. Molineux and J. J. Bull (1999). "Virulence evolution in a virus  
639 obeys a trade-off." Proc Biol Sci **266**(1417): 397-404.
- 640 Poullain, V., S. Gandon, M. A. Brockhurst, A. Buckling and M. E. Hochberg (2008).  
641 "The evolution of specificity in evolving and coevolving antagonistic interactions  
642 between a bacteria and its phage." Evolution **62**(1): 1-11.
- 643 Rakonjac, J. (2012). Filamentous Bacteriophages: Biology and Applications eLS. Ltd:  
644 Chichester, John Wiley & Sons.
- 645 Roux, S., M. Krupovic, R. A. Daly, A. L. Borges, S. Nayfach, F. Schulz, A. Sharrar, P.  
646 B. Matheus Carnevali, J. F. Cheng, N. N. Ivanova, J. Bondy-Denomy, K. C. Wrighton,  
647 T. Woyke, A. Visel, N. C. Kyrpides and E. A. Elze-Fadrosh (2019). "Cryptic inoviruses  
648 revealed as pervasive in bacteria and archaea across Earth's biomes." Nat Microbiol  
649 **4**(11): 1895-1906.
- 650 Shapiro, J. W. and P. E. Turner (2018). "Evolution of mutualism from parasitism in  
651 experimental virus populations." Evolution **72**(3): 707-712.
- 652 Shapiro, J. W., E. S. C. P. Williams and P. E. Turner (2016). "Evolution of parasitism  
653 and mutualism between filamentous phage M13 and Escherichia coli." PeerJ **4**.
- 654 Sweere, J. M., J. D. Van Belleghem, H. Ishak, M. S. Bach, M. Popescu, V. Sunkari, G.  
655 Kaber, R. Manasherob, G. A. Suh, X. Cao, C. R. de Vries, D. N. Lam, P. L. Marshall,  
656 M. Birukova, E. Katznelson, D. V. Lazzareschi, S. Balaji, S. G. Keswani, T. R. Hawn,  
657 P. R. Secor and P. L. Bollyky (2019). "Bacteriophage trigger antiviral immunity and  
658 prevent clearance of bacterial infection." Science **363**(6434): 1416-+.
- 659 Team, R. D. C. (2011). "R: A language and environment for statistical computing. R  
660 Foundation for Statistical Computing." Vienna, Austria. ISBN 3-900051-07-0, URL  
661 <http://www.R-project.org/>.

- 662 Turner, P. E., V. S. Cooper and R. E. Lenski (1998). "Tradeoff between Horizontal and  
663 Vertical Modes of Transmission in Bacterial Plasmids." Evolution **52**(2): 315-329.
- 664 Waldor, M. K. and J. J. Mekalanos (1996). "Lysogenic conversion by a filamentous  
665 phage encoding cholera toxin." Science **272**(5270): 1910-1914.
- 666 Weiss, S. R. and J. L. Leibowitz (2011). "Chapter 4 - Coronavirus Pathogenesis."  
667 Advances in Virus Research **81**: 85-164.
- 668 Wendling, C. C., H. Goehlich and O. Roth (2018). "The structure of temperate phage-  
669 bacteria infection networks changes with the phylogenetic distance of the host bacteria."  
670 Biol Lett **14**(11).
- 671 Wendling, C. C., A. Pieczyk, D. Refardt, C. Chibani, R. Hertel, H. Liesegang, B. Bunk,  
672 J. Overmann and O. Roth (2017). "Tripartite species interaction: eukaryotic hosts suffer  
673 more from phage susceptible than from phage resistant bacteria." BMC Evol Biol  
674 **17**(98).
- 675 Yu, Z. C., X. L. Chen, Q. T. Shen, D. L. Zhao, B. L. Tang, H. N. Su, Z. Y. Wu, Q. L.  
676 Qin, B. B. Xie, X. Y. Zhang, Y. Yu, B. C. Zhou, B. Chen and Y. Z. Zhang (2015).  
677 "Filamentous phages prevalent in *Pseudoalteromonas* spp. confer properties  
678 advantageous to host survival in Arctic sea ice." ISME J **9**(4): 871-881.  
679
